# Supplementary material
Source: publisher figshare collection journal article supplement (https://acs.figshare.com/ndownloader/files/4092712)
Supplement: Supplementary file 1 [file 4092712]

**Effective display of amino groups on substrate surfaces by simply dip-coating  
methacrylate-based polymers and its application of DNA immobilization**

Ayane Shimomura,<sup>†</sup> Takashi Nishino,<sup>†</sup> Tatsuo Maruyama<sup>†\*</sup>

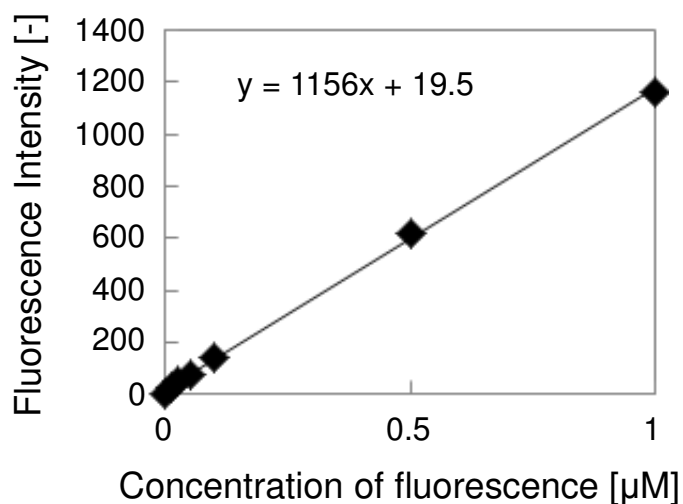

Fig. S1 Standard curve of the cleavable fluorescent compound in a 1/15 M phosphate buffer (pH 8.0) containing 2 mM DTT. The presence of DTT did not affect the fluorescence.

**HPLC elution conditions for a cleavable fluorescent compound.**

Mobile phase A: triethylammonium acetate buffer (0.1 M, pH 9.0)

Mobile phase B: acetonitrile

Flow rate: 5.0 mL/min

Column: an ODS-3 (10×250 mm, GL science) column

Temperature: 25 °C

Table S1. Gradient program for HPLC analysis of a cleavable fluorescent compound.

| Time [min] | Mobile phase A [%] | Mobile phase B [%] |
|------------|--------------------|--------------------|
| 0          | 90                 | 10                 |
| 15         | 75                 | 25                 |
| 20         | 30                 | 70                 |
| 30         | 10                 | 90                 |
| 40         | 90                 | 10                 |
